# Supplementary material for: Hyperglycemia on Admission Predicts Acute Kidney Failure and Renal Functional Recovery among Inpatients
Source: MDPI journal article supplement (doi:10.3390/jcm11010054), 2021-12-23
Supplement: s1 [file s1]

**Table S1.** Comparison of baseline variables, renal outcomes, and mortality in hospitalized patients with high baseline serum glucose (>180 mg/dL). Compared are patients with or without diabetes. .

| Variable                                                     | With diabetes<br>(n=11,262) | No diabetes<br>(n=4,113) | P-value | Total (n=15,675) |
|--------------------------------------------------------------|-----------------------------|--------------------------|---------|------------------|
| Age, years                                                   | 70 (18.4)                   | 68.9 (26.1)              | <0.001  | 69.7 (20.2)      |
| Male, n (%)                                                  | 5,991 (53%)                 | 2,451 (56%)              | <0.001  | 8,442 (54%)      |
| <b>Diagnoses, n (%)</b>                                      |                             |                          |         |                  |
| Hypertension                                                 | 1,787 (16%)                 | 284 (6%)                 | <0.001  | 2,071 (13%)      |
| IHD                                                          | 3,361 (30%)                 | 665 (15%)                | <0.001  | 4,026 (26%)      |
| Heart failure                                                | 1,193 (11%)                 | 286 (6%)                 | <0.001  | 1,479 (9%)       |
| COPD                                                         | 897 (8%)                    | 349 (8%)                 | 0.93    | 1,246 (8%)       |
| <b>Vital signs</b>                                           |                             |                          |         |                  |
| Heart rate, bpm                                              | 88 (24)                     | 90 (30)                  | 0.001>  | 88 (26)          |
| Systolic blood pressure, mmHg                                | 145 (43)                    | 137 (39)                 | 0.001>  | 143 (42)         |
| Temperature, °C                                              | 36.8 (0.5)                  | 36.8 (0.6)               | 0.001>  | 36.8 (0.5)       |
| Oxygen saturation, %                                         | 96 (4)                      | 97 (5)                   | 0.001>  | 96 (4)           |
| <b>Laboratory data</b>                                       |                             |                          | 0.001>  |                  |
| Hemoglobin, g/dL                                             | 10.7 (3.4)                  | 10.3 (3.7)               | 0.001>  | 10.6 (3.4)       |
| White blood cells, k/ul                                      | 10.6 (6.2)                  | 13 (8.3)                 | 0.001>  | 11.2 (6.9)       |
| Platelets, k/ul                                              | 195 (105)                   | 172 (105)                | 0.001>  | 188 (106)        |
| Creatinine, mg/dL                                            | 1.1 (0.7)                   | 1.1 (0.6)                | 0.001>  | 1.1 (0.7)        |
| Blood urea nitrogen, mg/dL                                   | 22 (17.6)                   | 19 (13.8)                | 0.001>  | 21 (17)          |
| Estimated glomerular filtration ratio, ml/min/m <sup>2</sup> | 58.3 (44.7)                 | 65.8 (43.4)              | 0.001>  | 60.3 (44.4)      |
| <b>(%) Medications and interventions, n</b>                  |                             |                          |         |                  |
| Loop diuretics                                               | 3648 (32%)                  | 1109 (25%)               | 0.001>  | 4757 (30%)       |
| Renin-angiotensin-aldosterone system inhibitors              | 6074 (54%)                  | 1326 (30%)               | 0.001>  | 7400 (47%)       |
| Fluids                                                       | 6678 (59%)                  | 2813 (64%)               | 0.001>  | 9491 (61%)       |
| Surgery                                                      | 1124 (10%)                  | 865 (20%)                | 0.001>  | 1989 (13%)       |
| Contrast administration                                      | 1134 (10%)                  | 840 (19%)                | 0.001>  | 1974 (13%)       |
| <b>Outcomes, n (%)</b>                                       |                             |                          |         |                  |
| AKI                                                          | 1,106 (10%)                 | 446 (10%)                | 0.61    | 1,552 (10%)      |
| AKI2                                                         | 131 (1%)                    | 102 (2%)                 | 0.001>  | 233 (1%)         |
| AKR                                                          | 2,628 (23%)                 | 1,221 (28%)              | 0.001>  | 3,849 (25%)      |
| AKR2                                                         | 357 (3%)                    | 219 (5%)                 | 0.001>  | 576 (4%)         |
| Mortality                                                    | 1,041 (9%)                  | 735 (17%)                | 0.001>  | 1,776 (11%)      |

IHD, ischemic heart disease; COPD, chronic obstructive pulmonary disease; AKI, acute kidney injury; AKR, acute

kidney recovery.

**Table S2.** Prediction of renal outcome and mortality among inpatients undergoing contrast-enhanced (n=10,026) or non-enhanced computerized tomography (n=27,451):

Shown are ORs with 95% CIs results following multivariate logistic regression including pre-imaging glucose levels, diabetes and other covariates.

| <b>Mortality</b>  | <b>Outcome with OR (95% CI)</b> |                   |                   |                                            |
|-------------------|---------------------------------|-------------------|-------------------|--------------------------------------------|
|                   | <b>Dialysis</b>                 | <b>AKR</b>        | <b>AKI</b>        |                                            |
| 1.82 (1.66, 1.99) | 1.69 (1.32, 2.11)               | 2.14 (1.98, 2.32) | 1.55 (1.39, 1.72) | <b>Glucose (OR per 100 mg/dL increase)</b> |
| 0.63 (0.57, 0.71) | 0.61 (0.47, 0.81)               | 0.66 (0.6, 0.72)  | 0.65 (0.58, 0.74) | <b>Glucose-Diabetes interaction</b>        |
| 1.04 (1.04, 1.04) | 1 (0.99, 1)                     | 1 (1, 1.01)       | 1.01 (1.01, 1.02) | Age (OR per 1 year increase)               |
| 1.06 (0.97, 1.15) | 0.94 (0.73, 1.2)                | 0.99 (0.92, 1.07) | 1.03 (0.93, 1.13) | Contrast-enhanced imaging                  |
|                   |                                 |                   |                   | <b>Chronic diseases</b>                    |
| 1.62 (1.35, 1.95) | 2.91 (1.84, 4.56)               | 1.57 (1.33, 1.85) | 2.07 (1.69, 2.53) | Diabetes                                   |
| 0.72 (0.63, 0.83) | 2.6 (2.03, 3.33)                | 0.5 (0.44, 0.57)  | 1.67 (1.47, 1.88) | Chronic kidney disease                     |
| 0.84 (0.77, 0.92) | 0.82 (0.63, 1.08)               | 1.09 (1.01, 1.19) | 1.13 (1.01, 1.26) | Hypertension                               |
| 0.99 (0.91, 1.08) | 0.98 (0.77, 1.23)               | 1.04 (0.96, 1.13) | 1 (0.9, 1.1)      | Ischemic heart disease                     |
| 1.06 (0.96, 1.17) | 1.4 (1.1, 1.78)                 | 0.9 (0.81, 0.99)  | 1.32 (1.18, 1.47) | Heart Failure                              |
| 1.2 (1.09, 1.31)  | 0.94 (0.73, 1.2)                | 0.85 (0.78, 0.93) | 0.96 (0.86, 1.06) | Cerebrovascular disease                    |
|                   |                                 |                   |                   | <b>Vital signs</b>                         |
| 0.99 (0.99, 0.99) | 1 (0.99, 1)                     | 0.99 (0.99, 0.99) | 1 (1, 1)          | SBP (OR per 1 mmHg increase)               |
|                   |                                 |                   |                   | <b>Laboratory results</b>                  |
| 1.21 (1.18, 1.25) | 1.64 (1.58, 1.71)               | 2.31 (2.22, 2.4)  | 1.21 (1.18, 1.24) | Creatinine (OR per 1 mg/dL increase)       |
| 0.89 (0.87, 0.9)  | 0.87 (0.84, 0.9)                | 1.06 (1.04, 1.07) | 0.95 (0.94, 0.97) | Hb (OR per 1 g/dL increase)                |
| 1.02 (1.01, 1.02) | 1 (1, 1.01)                     | 1.01 (1.01, 1.02) | 1.01 (1, 1.01)    | WBC (OR per 1 ul increase)                 |
|                   |                                 |                   |                   | <b>Medical treatment</b>                   |
| 0.81 (0.72, 0.9)  | 0.94 (0.69, 1.24)               | 0.64 (0.58, 0.71) | 1.05 (0.94, 1.17) | RAAS inhibitors                            |
| 1.27 (1.18, 1.38) | 1.38 (1.13, 1.7)                | 1.41 (1.32, 1.51) | 1.07 (0.98, 1.17) | Antibiotics                                |
| 1.85 (1.65, 2.08) | 1.76 (1.35, 2.28)               | 0.62 (0.54, 0.71) | 1.72 (1.52, 1.95) | Loop diuretics IV                          |
| 0.92 (0.82, 1.03) | 1.14 (0.86, 1.49)               | 1.05 (0.95, 1.15) | 0.84 (0.73, 0.96) | Glucose-containing fluids                  |

AKI, acute kidney injury; AKR, acute kidney recovery; eGFR, estimated glomerular filtration ratio; RAAS, renin-angiotensin-aldosterone system; SBP, systolic blood pressure; Hb, hemoglobin; WBC, white blood cells.; IV, intravenous;
